# Supplementary material for: EHD2 overexpression promotes tumorigenesis and metastasis in triple-negative breast cancer by regulating store-operated calcium entry
Source: eLife journal article supplement (doi:10.7554/elife.81288), 2023-01-10
Supplement: fig4-figsupp1-data1 [file Figure 4 figure supplement 1 table.xlsx]

## Sheet: Sheet1
	MDA-MB-231
			ctrl shRNA	EHD2 shRNA
		Primary tumor	6/6	4/6
		Lung Metastases	5/6	1/4
